# Supplementary material
Source: PubMed Central journal article supplement (PMC7357148)
Supplement: sj-pdf-1-ebm-10.1177_1535370220928275.pdf [file sj-pdf-1-ebm-10.1177_1535370220928275.pdf]

**Supplementary Figure 1:** Correlations of corneal histopathological parameters with conjunctival goblet cells, MG, HG, ELG and ILG.

|              |        | Conjunctival goblet cell | Lipid  |        | Water  |        |
|--------------|--------|--------------------------|--------|--------|--------|--------|
|              |        |                          | MG     | HG     | ELG    | ILG    |
| <b>All</b>   | $\rho$ | -0.685**                 | 0.331  | -0.04  | 0.327  | -0.242 |
|              | P      | < 0.01                   | 0.115  | 0.853  | 0.119  | 0.255  |
| <b>BXSB-</b> | $\rho$ | -0.748**                 | -0.102 | -0.189 | -0.154 | -0.329 |
| <b>Yaa</b>   | P      | < 0.01                   | 0.751  | 0.557  | 0.633  | 0.297  |

Spearman's rank correlation coefficients \*:  $P < 0.05$ , \*\*:  $P < 0.01$ .

All mice (n = 24), BXSB-Yaa: BXSB/MpJ-Yaa (n = 12)

Conjunctiva: The goblet cell density in the conjunctiva epithelium, MG: MG acinus density,

HG: The size of one acinus in the Harderian gland, ELG: The size of one acinus in the

extraorbital lacrimal gland and ILG: The size of one acinus in the intraorbital lacrimal gland.
